# Supplementary material for: Ab initio insights into support-induced sulfur resistance of Ni-based reforming catalysts
Source: Royal Society of Chemistry journal article supplement (doi:10.1039/d5cy01279a), 2026-01-01
Supplement: d5cy01279a1.pdf [file d5cy01279a1.pdf]

## ***Ab initio* insights into support-induced sulfur resistance of Ni-based reforming catalysts: supplementary information**

Amit Chaudhari <sup>a</sup>, Pavel Stishenko <sup>a</sup>, Akash Hiregange <sup>a</sup>, Christopher R. Hawkins <sup>b</sup>, Misbah Sarwar <sup>b</sup>, Stephen Poulston <sup>b</sup> and Andrew J. Logsdail <sup>\*a</sup>

---

<sup>a</sup> Cardiff Catalysis Institute, School of Chemistry, Cardiff University, Main Building, Park Place, Cardiff, CF10 3AT, United Kingdom.

<sup>b</sup> Johnson Matthey Technology Centre, Blount's Court, Sonning Common, Reading, RG4 9NH, United Kingdom.

\* E-mail: LogsdailA@cardiff.ac.uk

## S1 Electronic Structure Calculations

### S1.1 DFT Benchmarking

#### S1.1.1 Basis Set

The calculations in this manuscript were performed with FHI-aims versions 210618 and later, which were verified to yield consistent total energies and forces. All DFT+ $U$  calculations were performed with a patch, corresponding to the GitLab commit "a1ab632a0890b9a1c9373bbb1d75aa0f3faf4950", which contains software fixes for the use of refined Hubbard projectors consisting of a linear combination of the atomic and hydrogenic auxiliary basis functions. The light basis set was chosen to balance computational cost with the accuracy of the predicted bulk Ni vacancy formation energy ( $\Delta E_{\text{Ni Vac}}$ ) in a  $3 \times 3 \times 3$  supercell, relative to an experimental reference (1.79 eV)<sup>1</sup>, calculated using:

$$\Delta E_{\text{Ni Vac}} = E_{\text{Defective Ni Bulk}} + E_{\text{Isolated Ni Atom}} - E_{\text{Stoichiometric Ni Bulk}} \quad (1)$$

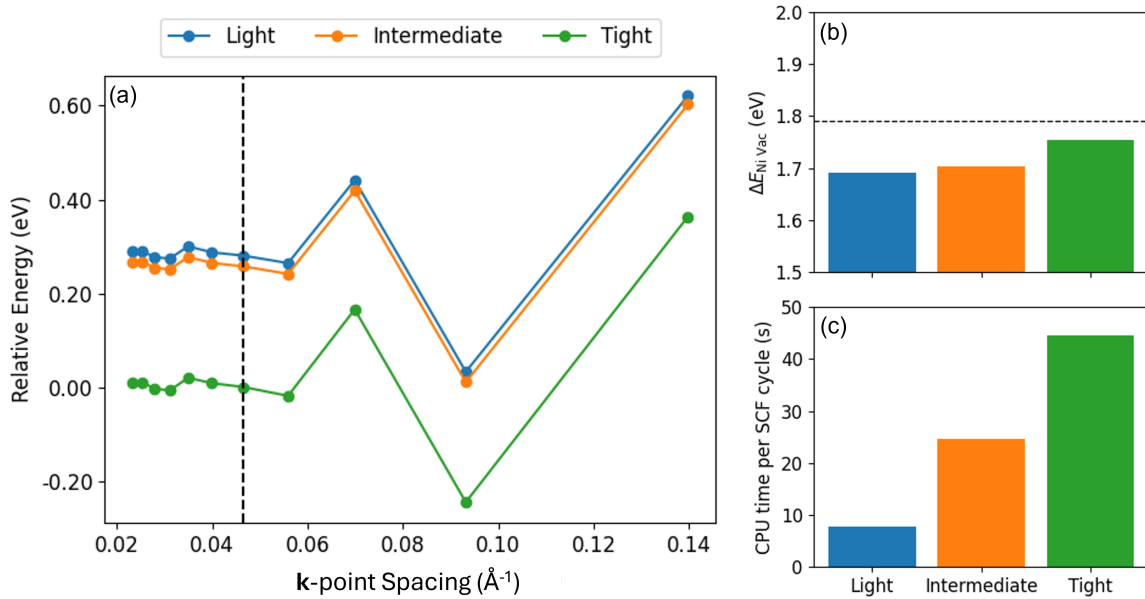

**Figure S1:** Comparing the effect of the basis set size on the (a) convergence of the relative total energy (vs. the converged value with the tight basis set) with respect to the  $k$ -point spacing, (b) the bulk Ni vacancy formation energy in a  $3 \times 3 \times 3$  supercell and (c) the CPU time per SCF cycle for the bulk Ni vacancy geometry optimisation simulation (all calculated using the PBE functional). The black dashed line in (a) denotes the converged  $k$ -point spacing and in (b) denotes the experimental defect energy.<sup>1</sup>

### S1.1.2 Exchange Correlation Density Functional

The accuracy of exchange correlation density functionals were assessed using the Euclidean norm of the percentage errors of the DFT-predicted  $\Delta E_{\text{Ni Vac}}$ ,  $V_0$  and cohesive energy ( $\Delta E_{\text{Coh}}$ ), relative to experimental references (1.79 eV,<sup>1</sup> 43.61421 Å<sup>3</sup><sup>2</sup> and 4.48 eV/atom,<sup>3</sup> respectively):

$$E^{\text{Exc}} = \left\| \frac{100 \times (\Delta E_{\text{Ni Vac}} - \Delta E_{\text{Ni Vac}}^{\text{Exp}})}{\Delta E_{\text{Ni Vac}}^{\text{Exp}}}, \frac{100 \times (V_0 - V_0^{\text{Exp}})}{V_0^{\text{Exp}}}, \frac{100 \times (\Delta E_{\text{Coh}} - \Delta E_{\text{Coh}}^{\text{Exp}})}{\Delta E_{\text{Coh}}^{\text{Exp}}} \right\| \quad (2)$$

where the cohesive energy is defined as:

$$\Delta E_{\text{Coh}} = \frac{E_{\text{Ni atom}} - E_{\text{Ni bulk}}}{N} \quad (3)$$

where  $N$  is the number of atoms in the bulk. We chose the mBEEF meta-GGA exchange correlation density functional as it provides the best balance of accuracy in Table S1 among the tested meta-GGAs, and noting that less expensive GGAs are reported to provide insufficient accuracy for modelling sulfur adsorption complexes on transition metal surfaces with accuracy that matches experimental observations.<sup>4</sup>

**Table S1:** DFT-calculated Ni vacancy formation energy ( $\Delta E_{\text{vac}}$ ), unit cell equilibrium volume ( $V_0$ ), cohesive energy ( $\Delta E_{\text{Coh}}$ ) and average error in Equation 2  $E^{\text{Exc}}$  for a range of exchange correlation density functionals. Rows are ordered from top to bottom for increasing values of  $E^{\text{Exc}}$ . Experimental reference values are included for comparison.<sup>1-3</sup>

| Functional | $\Delta E_{\text{vac}}$ (eV) | $V_0$ (Å <sup>3</sup> ) | $\Delta E_{\text{Coh}}$ (eV) | $E^{\text{Exc}}$ (%) |
|------------|------------------------------|-------------------------|------------------------------|----------------------|
| PBE        | 1.69                         | 43.17                   | 5.66                         | 26.92                |
| mBEEF      | 1.74                         | 41.15                   | 5.90                         | 32.39                |
| rSCAN      | 1.96                         | 41.22                   | 6.29                         | 41.93                |
| PBEsol     | 2.09                         | 41.22                   | 6.27                         | 43.67                |
| SCAN       | 1.97                         | 40.84                   | 6.46                         | 45.66                |
| BLYP       | 0.90                         | 45.32                   | 4.81                         | 50.25                |
| LDA        | 2.26                         | 39.87                   | 6.68                         | 56.36                |
| M06-L      | 2.88                         | 42.08                   | 6.55                         | 76.44                |
| Exp        | 1.79                         | 43.61                   | 4.48                         | N/A                  |

### S1.1.3 Ni(111) Surface Model

The pristine Ni(111) surface was modelled using a six layer symmetric periodic slab, of which the bottom three layers were frozen to mimic the system bulk, which is in line with computational literature studying the adsorption of catalyst poisons on Ni(111).<sup>5</sup> Our periodic slab model yields a converged surface energy  $\gamma^{\text{surf}}$  of 1.73 Jm<sup>-2</sup>, which is in reasonable agreement with experimental references (1.94 Jm<sup>-2</sup>), as shown in Figure S2.<sup>6</sup>  $\gamma^{\text{surf}}$  is defined as:<sup>7</sup>

$$\gamma^{\text{surf}} = \gamma^{\text{cleave}} + \gamma^{\text{relax}} = \frac{E_{\text{Ni slab}}^{\text{Unrelaxed}} - N^{\text{Form}} \times E_{\text{Ni bulk}}}{2 \times A} + \frac{E_{\text{Ni slab}}^{\text{Relaxed}} - E_{\text{Ni slab}}^{\text{Unrelaxed}}}{A} \quad (4)$$

where  $E_{\text{Ni slab}}^{\text{Relaxed}}$  ( $E_{\text{Ni slab}}^{\text{Unrelaxed}}$ ) denotes the energy of the geometry optimised (initial) Ni slab,  $E_{\text{Ni bulk}}$  denotes the energy of the geometry optimised Ni bulk,  $N^{\text{Form}}$  denotes the number of formula units in

the slab and  $A$  denotes the slab surface area.

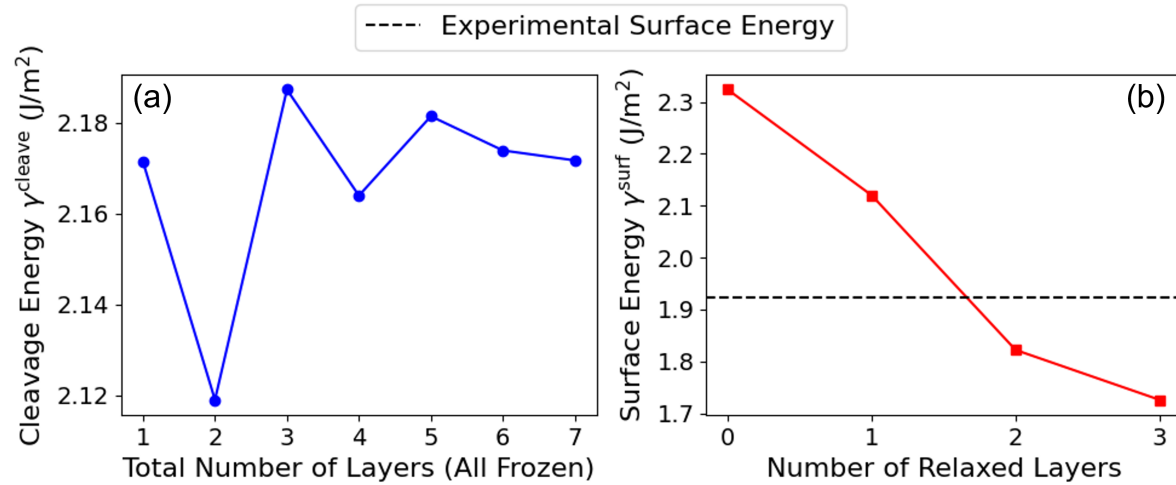

**Figure S2:** Convergence tests for the (a) cleavage energy and (b) surface energy of the Ni(111) periodic slab model used in this work, as defined in Equation 4.

#### S1.1.4 Adsorption Energies on Ni(111)

**Table S2:** Adsorption energies ( $\Delta E_{\text{Ads}}$ , eV) for atomic S, atomic O, molecular SO (for S binding to surface and OS for O binding to the surface) and molecular SO<sub>2</sub> on a  $1 \times 1$  Ni(111) surface, calculated using DFT with the mBEEF exchange correlation density functional. The active sites are (1) hollow HCP, (2) hollow FCC, (3) atop and (4) bridge, as illustrated in Section 3.1, Figure 2. Available literature comparisons are included with the corresponding exchange correlation density functional in brackets. Our results match the relative stabilities of adsorption complexes between active sites, but differences in absolute adsorption energies vs. the available literature are noted due to the use of GGA exchange correlation density functionals and different Ni(111) surface parameters, e.g., number of layers and supercell dimensions.

| Adsorbate       | Active Site | $\Delta E_{\text{Ads}}$ (eV) | Literature                                                                                                                                |
|-----------------|-------------|------------------------------|-------------------------------------------------------------------------------------------------------------------------------------------|
| S               | 1           | -7.09                        | -5.07 (PW91) <sup>8</sup> , -4.57 (RPBE) <sup>8</sup> , -5.56 (PBE) <sup>9</sup> , -5.16 (PBE) <sup>10</sup>                              |
| S               | 2           | -7.14                        | -5.12 (PW91) <sup>8</sup> , -4.62 (RPBE) <sup>8</sup> , -4.69 (RPBE) <sup>11</sup> , -5.62 (PBE) <sup>9</sup> , -5.21 (PBE) <sup>10</sup> |
| O               | 1           | -6.25                        | -5.02 (PW91) <sup>8</sup> , -4.42 (RPBE) <sup>8</sup> , -5.76 (PBE) <sup>9</sup> , -5.91 (PBE) <sup>10</sup>                              |
| O               | 2           | -6.48                        | -5.13 (PW91) <sup>8</sup> , -4.52 (RPBE) <sup>8</sup> , -5.87 (PBE) <sup>9</sup> , -6.02 (PBE) <sup>10</sup>                              |
| SO (OS)         | 1           | -4.62 (-2.27)                | N/A                                                                                                                                       |
| SO (OS)         | 2           | -4.64 (-2.54)                | -2.08 (PW91) <sup>12</sup>                                                                                                                |
| SO <sub>2</sub> | 3           | -2.00                        | -1.03 (PBE) <sup>10</sup>                                                                                                                 |
| SO <sub>2</sub> | 4           | -2.08                        | -1.08 (PBE) <sup>10</sup>                                                                                                                 |



### S1.2 DFT+ $U$ Parameterisation

To accurately parameterise DFT+ $U$ , one must account for both the magnitude and basis of the Hubbard correction, which are defined using the Hubbard  $U$  value and the Hubbard projector function (or Hubbard projector), respectively.<sup>13,14</sup> These parameters are used to correct the DFT-predicted total energy ( $E_{\text{DFT}}$ ) with a corrective Hubbard term that treats localised states only ( $E_U^0$ ) and a double counting correction ( $E_U^{\text{dc}}$ ) that prevents the double counting of localised states in both  $E_{\text{DFT}}$  and  $E_U^0$ :

$$E_{\text{DFT}+U}[\rho(\mathbf{r}), \mathbf{n}_{I,m}^\sigma] = E_{\text{DFT}}[\rho(\mathbf{r})] + E_U^0[\mathbf{n}_{I,m}^\sigma] - E_U^{\text{dc}}[\mathbf{n}_{I,m}^\sigma] \quad (5)$$

where  $\rho(\mathbf{r})$  is the electron density and  $\mathbf{n}_{I,m}^\sigma$  is the occupation matrix, whose diagonal elements correspond to orbital occupation numbers for all atoms ( $I$ ), orbital magnetic quantum numbers ( $m$ ) and spin channels ( $\sigma$ ). According to the rotationally invariant, spherically averaged implementation proposed by Dudarev *et al.*,<sup>15</sup> the corrective Hubbard term is calculated using the trace (Tr) of the occupation matrix and its square:

$$E_U^0[\mathbf{n}_I^\sigma] = \sum_{(\sigma,I)} U^I [\text{Tr}(\mathbf{n}_I^\sigma) - \text{Tr}(\mathbf{n}_I^\sigma \mathbf{n}_I^\sigma)] \quad (6)$$

The occupation matrix is calculated by projecting all DFT-predicted Kohn-Sham states onto the Hubbard projectors,<sup>13</sup> which were modified from the default atomic functions for both Ti 3d and Ce 4f orbitals to ensure self-consistent resolution of the DFT+ $U$  occupation matrices when modelling point defects, as discussed in previous work.<sup>14</sup> Modified atomic-like Hubbard projectors were constructed as a linear combination of the corresponding atomic and hydrogenic auxiliary basis functions in the light basis set, where the auxiliary basis function is subject to a Gram–Schmidt orthogonalisation with respect to the atomic function. The linear combinations were defined using the linear expansion coefficients  $c_1$  and  $c_2$ , respectively, and were simultaneously optimised with Hubbard  $U$  values using a machine learning-based workflow that targets the bulk material covalency, as calculated using hybrid-DFT.<sup>14</sup> The Hubbard  $U$  values and projector coefficients  $c_1$  and  $c_2$  used in this work are listed in Table S3.

**Table S3:** Parameterised Hubbard  $U$  values (eV), projector coefficients  $c_1$  and  $c_2$  and supercell sizes used in this work.

| Support Material                         | Corrected Orbital | Hubbard $U$ (eV) | $c_1$ | $c_2$  | Supercell Size |
|------------------------------------------|-------------------|------------------|-------|--------|----------------|
| $\gamma$ -Al <sub>2</sub> O <sub>3</sub> | N/A               | N/A              | N/A   | N/A    | 1×1×3          |
| TiO <sub>2</sub>                         | Ti 3d             | 2.575            | 0.752 | -0.486 | 2×2×5          |
| CeO <sub>2</sub>                         | Ce 4f             | 2.653            | 0.561 | -0.600 | 2×2×3          |

The DFT- and DFT+ $U$ -predicted band gap ( $E_{\text{bg}}$ ),  $V_0$  and formation energy ( $\Delta E_{\text{Form}}$ ) of each material are compared with experimental references in Table S4. Here,  $\Delta E_{\text{Form}}$  is calculated using the energies of bulk Ti (in the hexagonal close packed, HCP, crystal structure), bulk Al and Ce (both in the cubic

crystal structure) and an isolated O<sub>2</sub> molecule:

$$\Delta E_{\text{Form}} = E_{\text{MO}_x} - E_{\text{M}} - x \times E_{\text{O}_2} \quad (7)$$

**Table S4:** DFT- and DFT+*U*-predicted geometric, electronic and energetic properties of bulk  $\gamma$ -Al<sub>2</sub>O<sub>3</sub>, rutile TiO<sub>2</sub> and CeO<sub>2</sub> versus experimental references. The Hubbard parameters for Ti 3*d* orbitals are  $U = 2.575$  eV,  $c_1 = 0.752$  and  $c_2 = -0.486$ , whilst those for Ce 4*f* orbitals are  $U = 2.653$  eV,  $c_1 = 0.561$  and  $c_2 = -0.600$ . No Hubbard correction is applied for  $\gamma$ -Al<sub>2</sub>O<sub>3</sub> or Ni in this work.

| Material                                 | Method        | $E_{\text{bg}}$ (eV) | $V_0$ (Å <sup>3</sup> ) | $\Delta E_{\text{Form}}$ (eV/Atom) |
|------------------------------------------|---------------|----------------------|-------------------------|------------------------------------|
| $\gamma$ -Al <sub>2</sub> O <sub>3</sub> | DFT           | 5.66                 | 371.77                  | -3.22                              |
| $\gamma$ -Al <sub>2</sub> O <sub>3</sub> | Experimental  | 7.20 <sup>16</sup>   | 371.12 <sup>17</sup>    | -3.43 <sup>18</sup>                |
| TiO <sub>2</sub>                         | DFT+ <i>U</i> | 2.47                 | 62.86                   | -3.00                              |
| TiO <sub>2</sub>                         | Experimental  | 3.00 <sup>19</sup>   | 62.44 <sup>20</sup>     | -3.26 <sup>21</sup>                |
| CeO <sub>2</sub>                         | DFT+ <i>U</i> | 2.38                 | 159.95                  | -3.73                              |
| CeO <sub>2</sub>                         | Experimental  | 3.20 <sup>22</sup>   | 158.43 <sup>23</sup>    | -3.77 <sup>24</sup>                |

## S2 Many-Body Tensor Representations

Two-body many-body tensor representations (MBTRs)<sup>25</sup> were evaluated using the *DScRibe* Python library.<sup>26,27</sup> Pairwise interatomic distances between adsorbed S and O atoms were encoded as a smooth density distribution over a continuous grid, defined over the range of 0 to 10 Å, with a Gaussian broadening parameter set to 0.1. An exponential weighting function was applied with a decay scale of 0.5, as well as a threshold of 10<sup>-3</sup>, which acts as a cutoff for discarding small Gaussian contributions and therefore emphasise closer atomic interactions. No normalisation was applied to preserve the raw spatial distributions. The smooth density distribution was discretised into five equally spaced bins, yielding five two-body MBTR descriptors ( $D_i$ ), before being reduced to a one-dimensional descriptor using principal component analysis (PCA) with the *Scikit-learn* Python library.<sup>28</sup> The principal component output from PCA (PC<sup>MBTR</sup>) is defined as:

$$\text{PC}^{\text{MBTR}} = (0.4852 \times D_2) + (0.5003 \times D_3) + (0.5070 \times D_4) + (0.5071 \times D_5) \quad (8)$$

where  $D_i$  denotes the discretised MBTR descriptors and  $D_1 = 0$  as short-range S-O interactions are excluded from the GCMC sampling and therefore not present in the resulting adlayers. PC<sup>MBTR</sup> therefore captures the most significant trends in the spatial disorder of co-adsorbed S and O.

### S3 MACE Optimisation of GCMC Adlayers

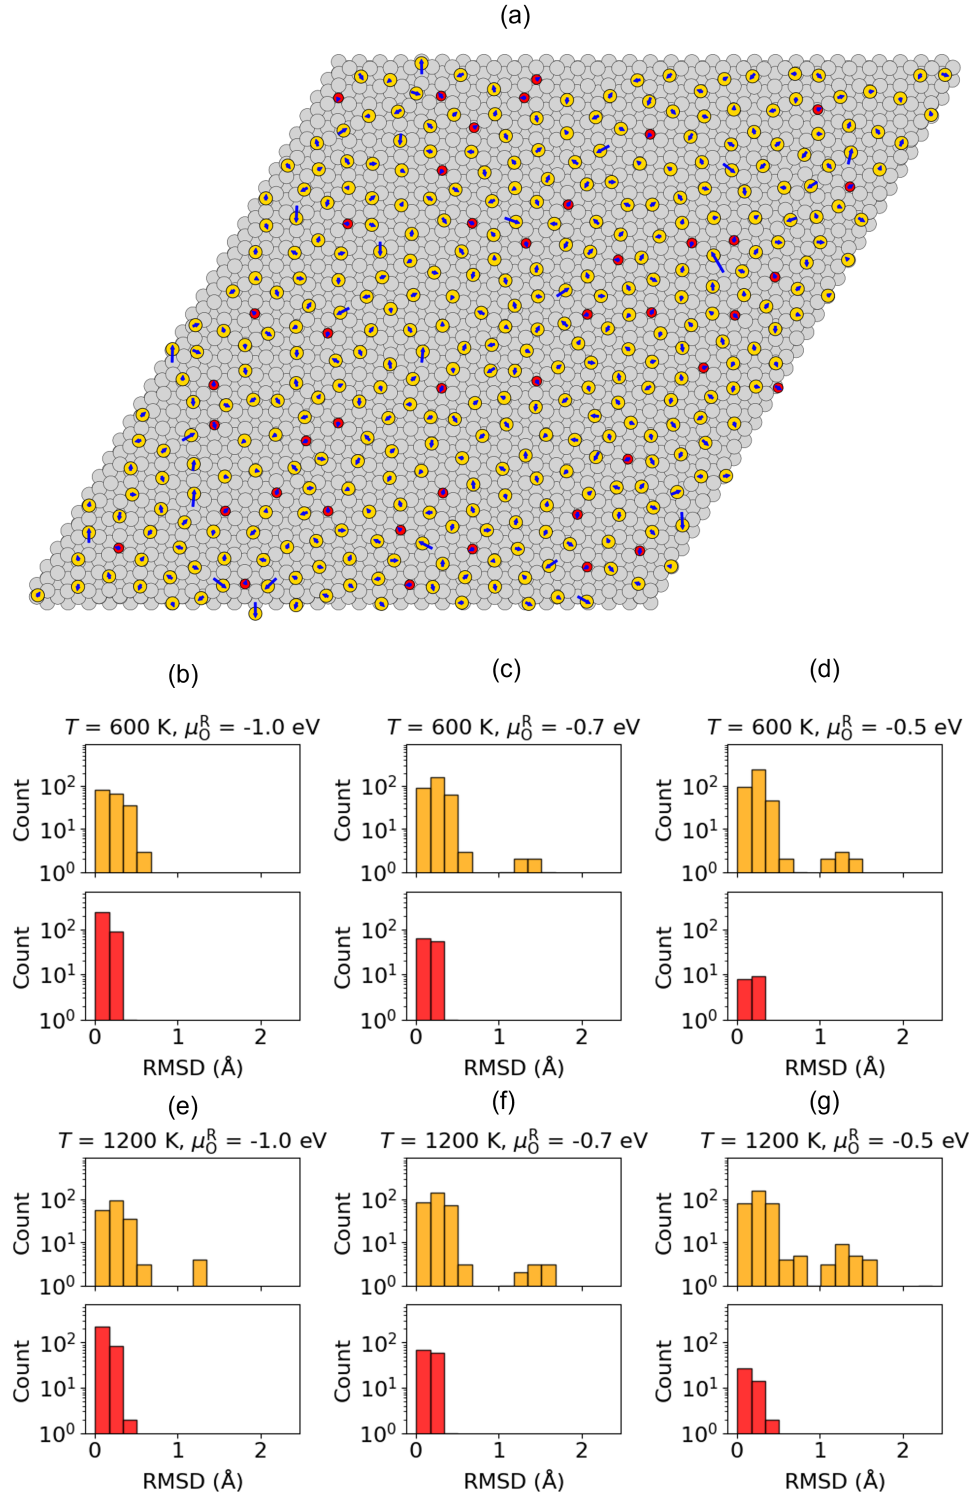

**Figure S3:** (a) The MACE-reoptimised structure for the GCMC-predicted adlayer for  $\mu_S^R = -1$  eV,  $\mu_O^R = -0.5$  eV and  $T = 1200$  K, which corresponds to the largest RMSD in Section 3.2, Figure 4(d). The arrows indicate the direction and magnitude of atomic S and O displacements from the initial GCMC-predicted atomic positions. (b)-(e) Histograms of RMSD of S (yellow bars) and O (red bars) atoms between the GCMC-predicted and MACE-reoptimised adlayers for all six validated adlayers in Section 3.2, Figure 4(d).

## S4 Scanning Electron Microscopy

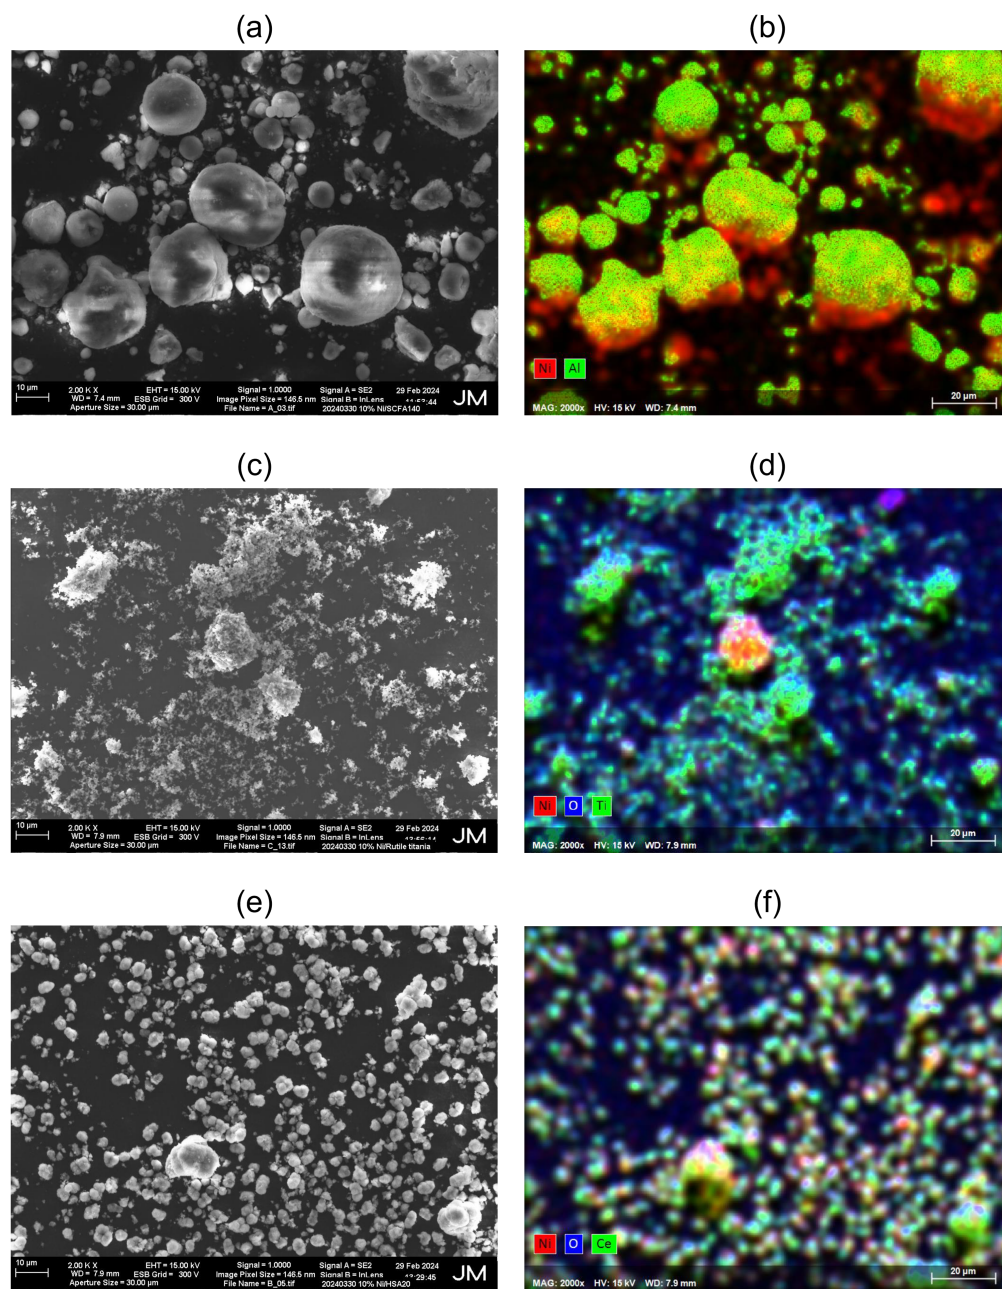

**Figure S4:** Scanning electron microscopy images of the microstructure of the prepared (a) Ni/γ-Al<sub>2</sub>O<sub>3</sub>, (c) Ni/TiO<sub>2</sub> and (e) Ni/CeO<sub>2</sub> catalysts. The corresponding elemental mapping of Ni (red), O (blue) and either (b) Al, (d) Ti or (f) Ce (green) shows the variation in the Ni dispersion amongst the prepared catalysts, which is significantly lower for Ni/TiO<sub>2</sub>.

## Notes and references

- 1 B. Medasani, M. Haranczyk, A. Canning and M. Asta, *Comput. Mater. Sci.*, 2015, **101**, 96–107.
- 2 M. Asadikiya, V. Drozd, S. Yang and Y. Zhong, *Mater. Today Commun.*, 2020, **23**, 100905.
- 3 P. Janthon, S. A. Luo, S. M. Kozlov, F. Viñes, J. Limtrakul, D. G. Truhlar and F. Illas, *J. Chem. Theory Comput.*, 2014, **10**, 3832–3839.
- 4 P. M. Spurgeon, D.-J. Liu, J. Oh, J. W. Evans and P. A. Thiel, *Sci. Rep.*, 2019, **9**, 19842.
- 5 S. S. Yadavalli, G. Jones and M. Stamatakis, *Phys. Chem. Chem. Phys.*, 2021, **23**, 15601–15612.
- 6 H. Meltzman, D. Chatain, D. Avizemer, T. M. Besmann and W. D. Kaplan, *Acta Mater.*, 2011, **59**, 3473–3483.
- 7 J. C. Boettger, *Phys. Rev. B*, 1994, **49**, 16798–16800.
- 8 Y. Bai, D. Kirvassilis, L. Xu and M. Mavrikakis, *Surf. Sci.*, 2019, **679**, 240–253.
- 9 V. Alexandrov, M. L. Sushko, D. K. Schreiber, S. M. Bruemmer and K. M. Rosso, *Corros. Sci.*, 2016, **113**, 26–30.
- 10 L. Liu, C. Zhang, W. Wang, G. Li and B. Zhu, *Molecules*, 2023, **28**, 6739.
- 11 C. R. Bernard Rodríguez and J. A. Santana, *J. Chem. Phys.*, 2018, **149**, 204701.
- 12 N. K. Das and W. A. Saidi, *J. Chem. Phys.*, 2017, **146**, 154701.
- 13 M. Kick, K. Reuter and H. Oberhofer, *J. Chem. Theory Comput.*, 2019, **15**, 1705–1718.
- 14 A. Chaudhari, K. Agrawal and A. J. Logsdail, *Digit. Discov.*, 2025, **4**, 3701–3727.
- 15 S. L. Dudarev, G. A. Botton, S. Y. Savrasov, C. J. Humphreys and A. P. Sutton, *Phys. Rev. B*, 1998, **57**, 1505–1509.
- 16 R. H. French, *J. Am. Ceram. Soc.*, 1990, **73**, 477–489.
- 17 S. Wilson, *J. Solid State Chem.*, 1979, **30**, 247–255.
- 18 S. Carstens, R. Meyer and D. Enke, *Materials*, 2020, **13**, 1787.
- 19 L. Kavan, M. Grätzel, S. E. Gilbert, C. Klemenzen and H. J. Scheel, *J. Am. Chem. Soc.*, 1996, **118**, 6716–6723.
- 20 T. Arlt, M. Bermejo, M. A. Blanco, L. Gerward, J. Z. Jiang, J. Staun Olsen and J. M. Recio, *Phys. Rev. B*, 2000, **61**, 14414–14419.
- 21 M. Arrigoni and G. K. H. Madsen, *J. Chem. Phys.*, 2020, **152**, 044110.
- 22 S. Phoka, P. Laokul, E. Swatsitang, V. Promarak, S. Seraphin and S. Maensiri, *Mater. Chem. Phys.*, 2009, **115**, 423–428.
- 23 L. Gerward, J. Staun Olsen, L. Petit, G. Vaitheeswaran, V. Kanchana and A. Svane, *J. Alloys Compd.*, 2005, **400**, 56–61.
- 24 F. B. Baker, E. J. Huber, C. E. Holley and N. Krikorian, *J. Chem. Thermodyn.*, 1971, **3**, 77–83.

- 25 H. Huo and M. Rupp, *Mach. Learn.: Sci. Technol.*, 2022, **3**, 045017.
- 26 L. Himanen, M. O. J. Jäger, E. V. Morooka, F. Federici Canova, Y. S. Ranawat, D. Z. Gao, P. Rinke and A. S. Foster, *Comput. Phys. Commun.*, 2020, **247**, 106949.
- 27 J. Laakso, L. Himanen, H. Homm, E. V. Morooka, M. O. J. Jäger, M. Todorović and P. Rinke, *J. Chem. Phys.*, 2023, **158**, 234802.
- 28 F. Pedregosa, G. Varoquaux, A. Gramfort, V. Michel, B. Thirion, O. Grisel, M. Blondel, P. Prettenhofer, R. Weiss, V. Dubourg, J. Vanderplas, A. Passos, D. Cournapeau, M. Brucher, M. Perrot and E. Duchesnay, *J. Mach. Learn. Res.*, 2011, **12**, 2825–2830.
